# Supplementary material for: Survey of Alternaria Toxins and Other Mycotoxins in Dried Fruits in China
Source: PubMed Central journal article supplement (PMC5535147; doi:10.3390/toxins9070200), 2017-06-26
Supplement: toxins-09-00200-s001.pdf [file toxins-09-00200-s001.pdf]

## Supplementary Materials: Survey of *Alternaria* Toxins and Other Mycotoxins in Dried Fruits in China

Dizhe Wei, Yao Wang, Dongmei Jiang, Xiaoyuan Feng, Jun Li and Meng Wang

Table S1. Optimized MRM parameters for mycotoxin analyzed.

| Mycotoxins <sup>a</sup> | Ionization mode | Retention Time (min) | Precursor ion (m/z) | Quantitative ion (Collision Energy) | Qualitative ion (Collision energy) | Cone voltage (V) |
|-------------------------|-----------------|----------------------|---------------------|-------------------------------------|------------------------------------|------------------|
| AME                     | ESI-            | 6.85                 | 271.0               | 256.0 (35)                          | 213.0 (20)                         | 32               |
| PAT                     | ESI-            | 2.12                 | 153.0               | 108.9 (10)                          | 80.9 (12)                          | 10               |
| AOH                     | ESI+            | 5.74                 | 259.0               | 213.2 (20)                          | 185.1 (30)                         | 30               |
| TeA                     | ESI+            | 2.45                 | 198.2               | 125.0 (20)                          | 139.0 (15)                         | 24               |
| TEN                     | ESI+            | 6.02                 | 415.2               | 312.1 (20)                          | 171.5 (20)                         | 17               |
| ALT                     | ESI+            | 5.10                 | 293.1               | 257.0 (14)                          | 239.1 (20)                         | 16               |
| OTA                     | ESI+            | 5.54                 | 404.2               | 239.1 (19)                          | 358.1 (14)                         | 30               |
| OTB                     | ESI+            | 4.96                 | 370.2               | 205.2 (22)                          | 187.1 (36)                         | 32               |
| PA                      | ESI+            | 2.92                 | 171.1               | 125.1 (12)                          | 153.1 (7)                          | 20               |
| DON                     | ESI+            | 2.93                 | 297.1               | 102.0(15)                           | 249.2 (10)                         | 30               |
| Fus-X                   | ESI+            | 3.57                 | 355.2               | 247.1 (15)                          | 229.1 (10)                         | 28               |
| 3-AcDON                 | ESI+            | 4.22                 | 339.2               | 231.1 (14)                          | 203.0 (12)                         | 28               |
| 15-AcDON                | ESI+            | 4.24                 | 339.2               | 261.1 (10)                          | 137.0 (20)                         | 30               |
| DAS                     | ESI+            | 5.22                 | 367.2               | 307.2 (10)                          | 289.1 (12)                         | 20               |
| HT-2                    | ESI+            | 5.87                 | 442.2               | 263.1 (20)                          | 105.1 (37)                         | 25               |
| T-2                     | ESI+            | 6.28                 | 484.2               | 305.1 (8)                           | 245.1 (9)                          | 30               |
| MPA                     | ESI+            | 5.04                 | 321.0               | 207.0 (24)                          | 159.0 (30)                         | 22               |

<sup>a</sup> AME: alternariol monomethyl ether; PAT: patulin; AOH: alternariol; TeA: tenuazonic acid; TEN: tentoxin; ALT: altenuene; OTA: Ochratoxin A; OTB: Ochratoxin B; PA: Penicilic acid; DON: deoxynivalenol; Fus-X: Fusarenon-X; 3-AcDON: 3-Acetyl-Deoxynivalenol; DAS: Diacetoxyscirpenol; MPA: Mycophenolic acid.

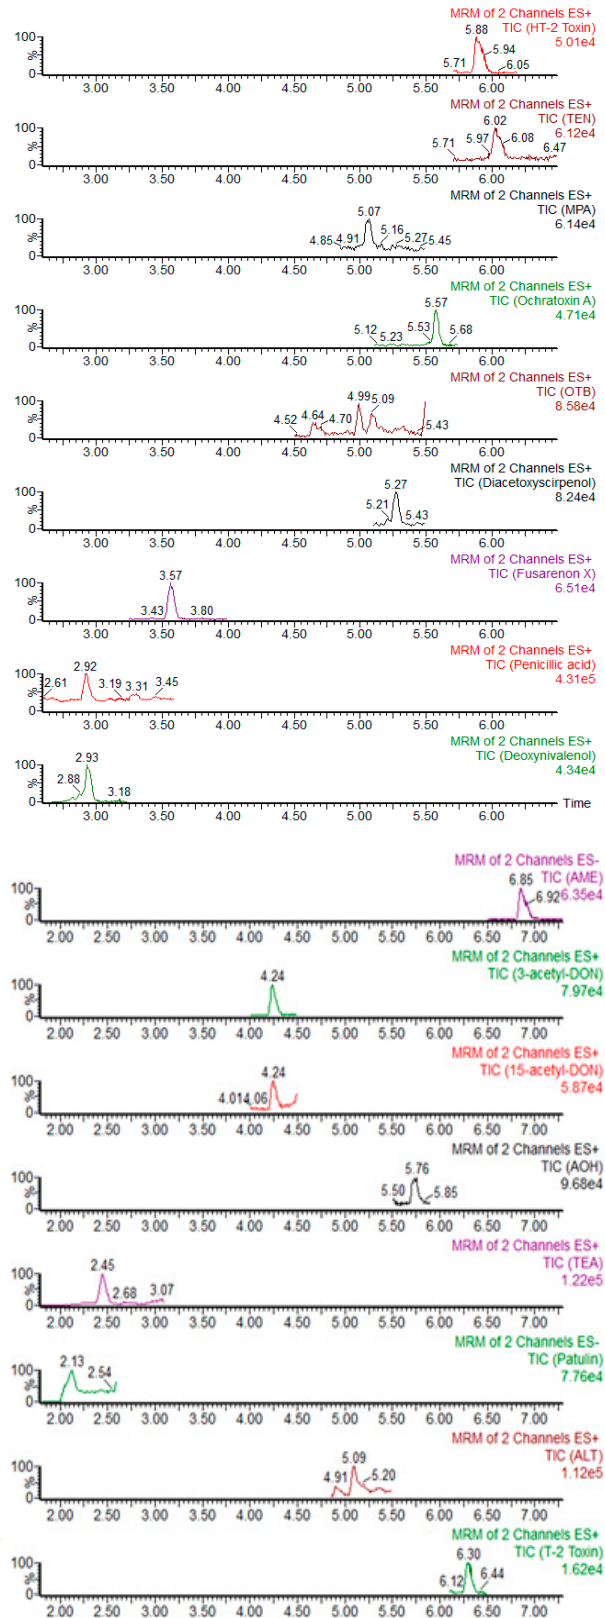

Figure S1. MRM chromatograms for 17 targeted mycotoxins at a LOQ level validated in raisins.

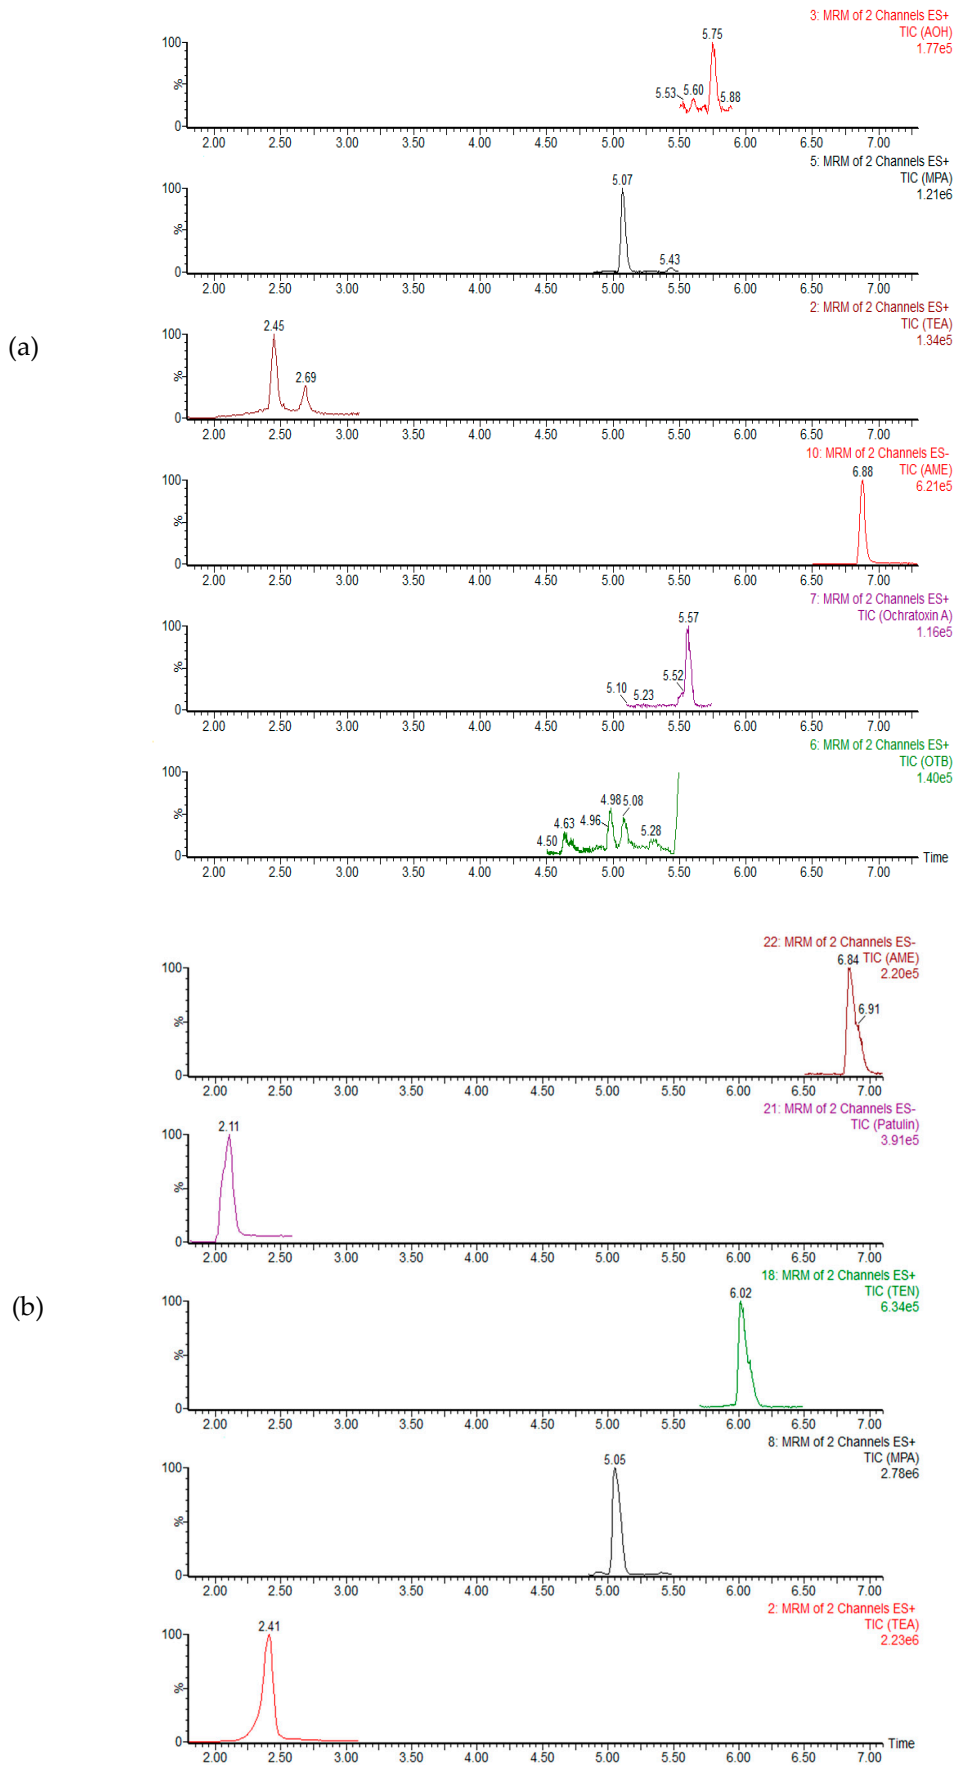

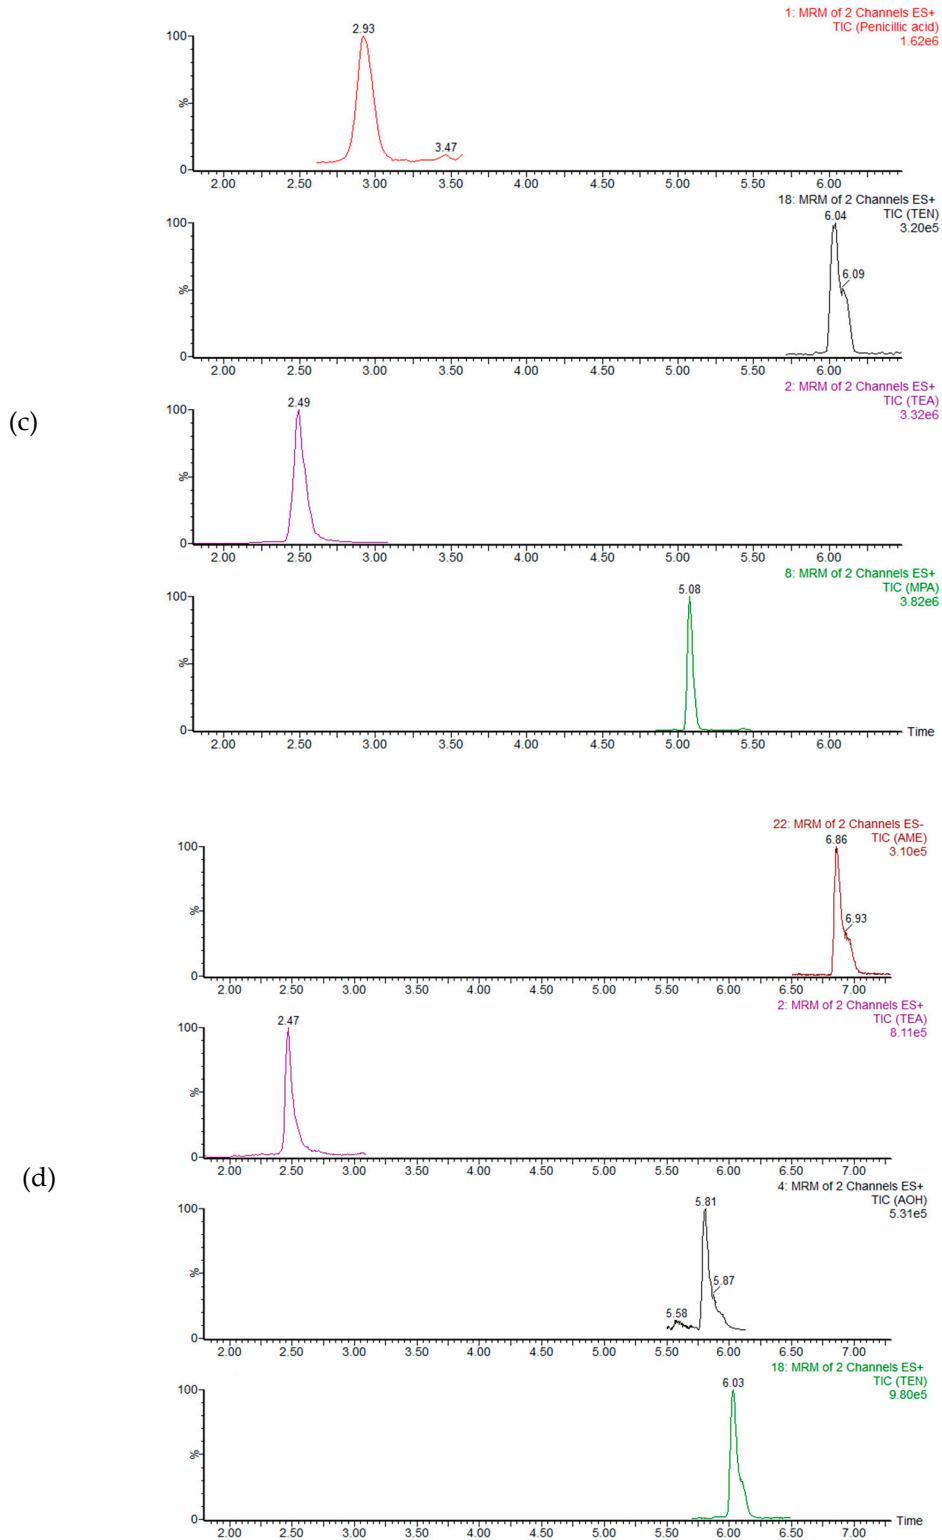

**Figure S2.** MRM chromatograms of naturally contaminated samples. (a) raisins with 1.8 ng mL<sup>-1</sup> for AOH, 2.0 ng mL<sup>-1</sup> for MPA, 5.5 ng mL<sup>-1</sup> for TeA; 1.0 ng mL<sup>-1</sup> for AME, 0.2 ng mL<sup>-1</sup> for OTA and 0.1 ng mL<sup>-1</sup> for OTB; (b) dried apricots with 0.2 ng mL<sup>-1</sup> for AME, 30.6 ng mL<sup>-1</sup> for PAT, 10.3 ng mL<sup>-1</sup> for TEN, 5.0 ng mL<sup>-1</sup> for MPA and 100.5 ng mL<sup>-1</sup> for TeA; (c) dried dates with 20.4 ng mL<sup>-1</sup> for PA, 5.0 ng mL<sup>-1</sup> for TEN, 145.6 ng mL<sup>-1</sup> for TeA and 7.5 ng mL<sup>-1</sup> for MPA; (d) dried wolfberries with 0.6 ng mL<sup>-1</sup> for AME, 145.6 ng mL<sup>-1</sup> for TeA, 5.9 ng mL<sup>-1</sup> for AOH; 5.0 ng mL<sup>-1</sup> for TEN.
